# Supplementary material
Source: PubMed Central journal article supplement (PMC4886759)
Supplement: JB.01019-15_zjb999094064so1.pdf [file JB.01019-15_zjb999094064so1.pdf]

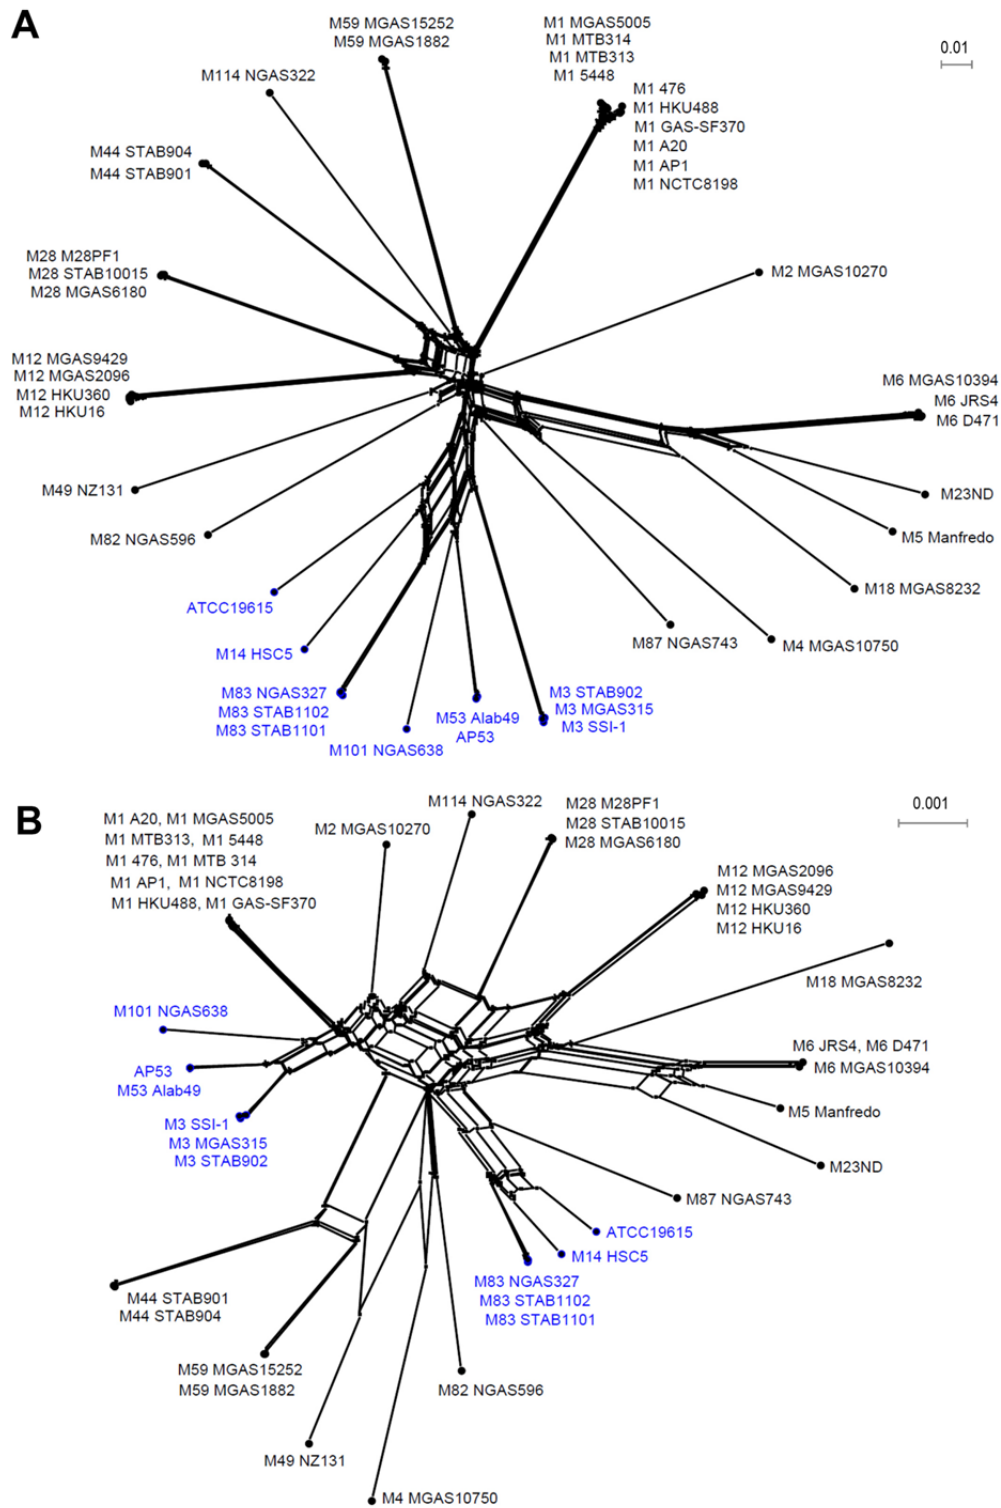

**FIG S1 The phylogenetic network structure of GAS strains constructed from pair-wise distances of all GAS genomes based on the SNPs.** The networks were determined for: (A) the core genome of GAS, containing 71,558 SNP loci; (B) seven housekeeping genes, *i.e.*, *gki*, *gtr*, *murI*, *mutS*, *recP*, *xpt*, and *yqiL*, generating 434 SNP loci. Skin-tropic strains, *i.e.*, AP53, Alab49, M101 NGAS638, M83 strains, M3 strains, ATCC19615, and M14 HSC5, were clustered together in (A), whereas re-distributed in distinct clusters in (B). Those strains were highlighted with blue. The pair-wise distance was estimated based on the model of Maximum Composite Likelihood and the network reconstruction was implemented by NeighborNet in SplitsTree.

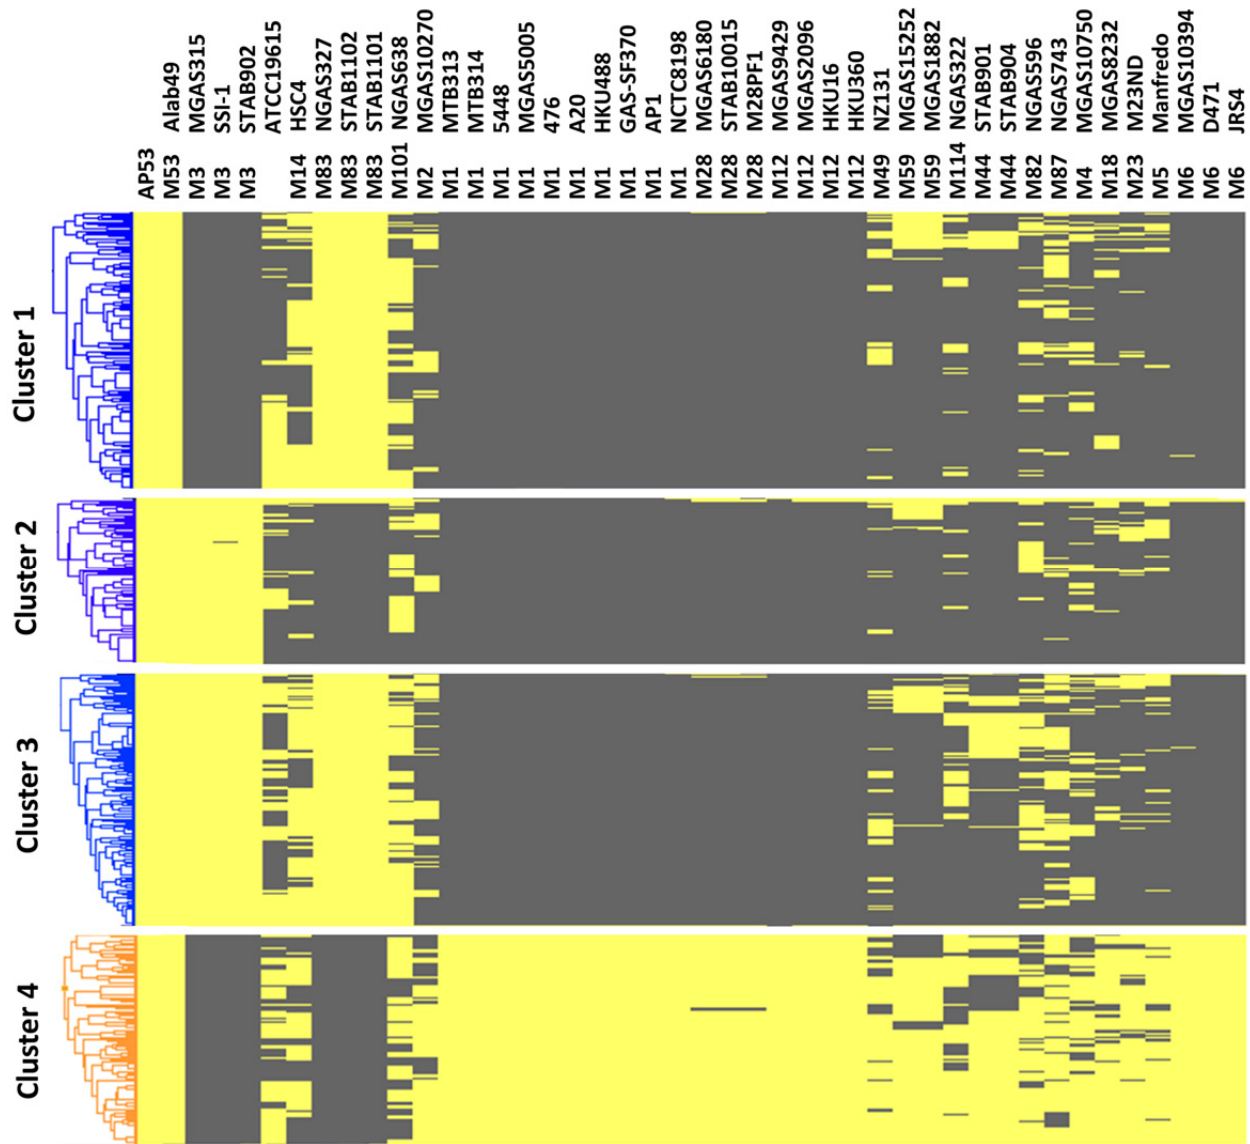

**FIG S2 The candidate skin-specific SNPs assessed by clustering of the non-synonymous SNP allele patterns for all the compared genomes.** Four clusters were inferred: (1) the SNP alleles present in strains of M53 and M83; (2) the SNP alleles present in strains of M53 and M3; (3) the SNP alleles present in strains of M53, M83 and M3; (4) The SNP alleles present in strains of M83 and M3. The simultaneous occurrence of the alleles in different strains is indicated by the same color. The detailed description of SNP alleles at each locus can be found in Supplementary Dataset 1.

**A**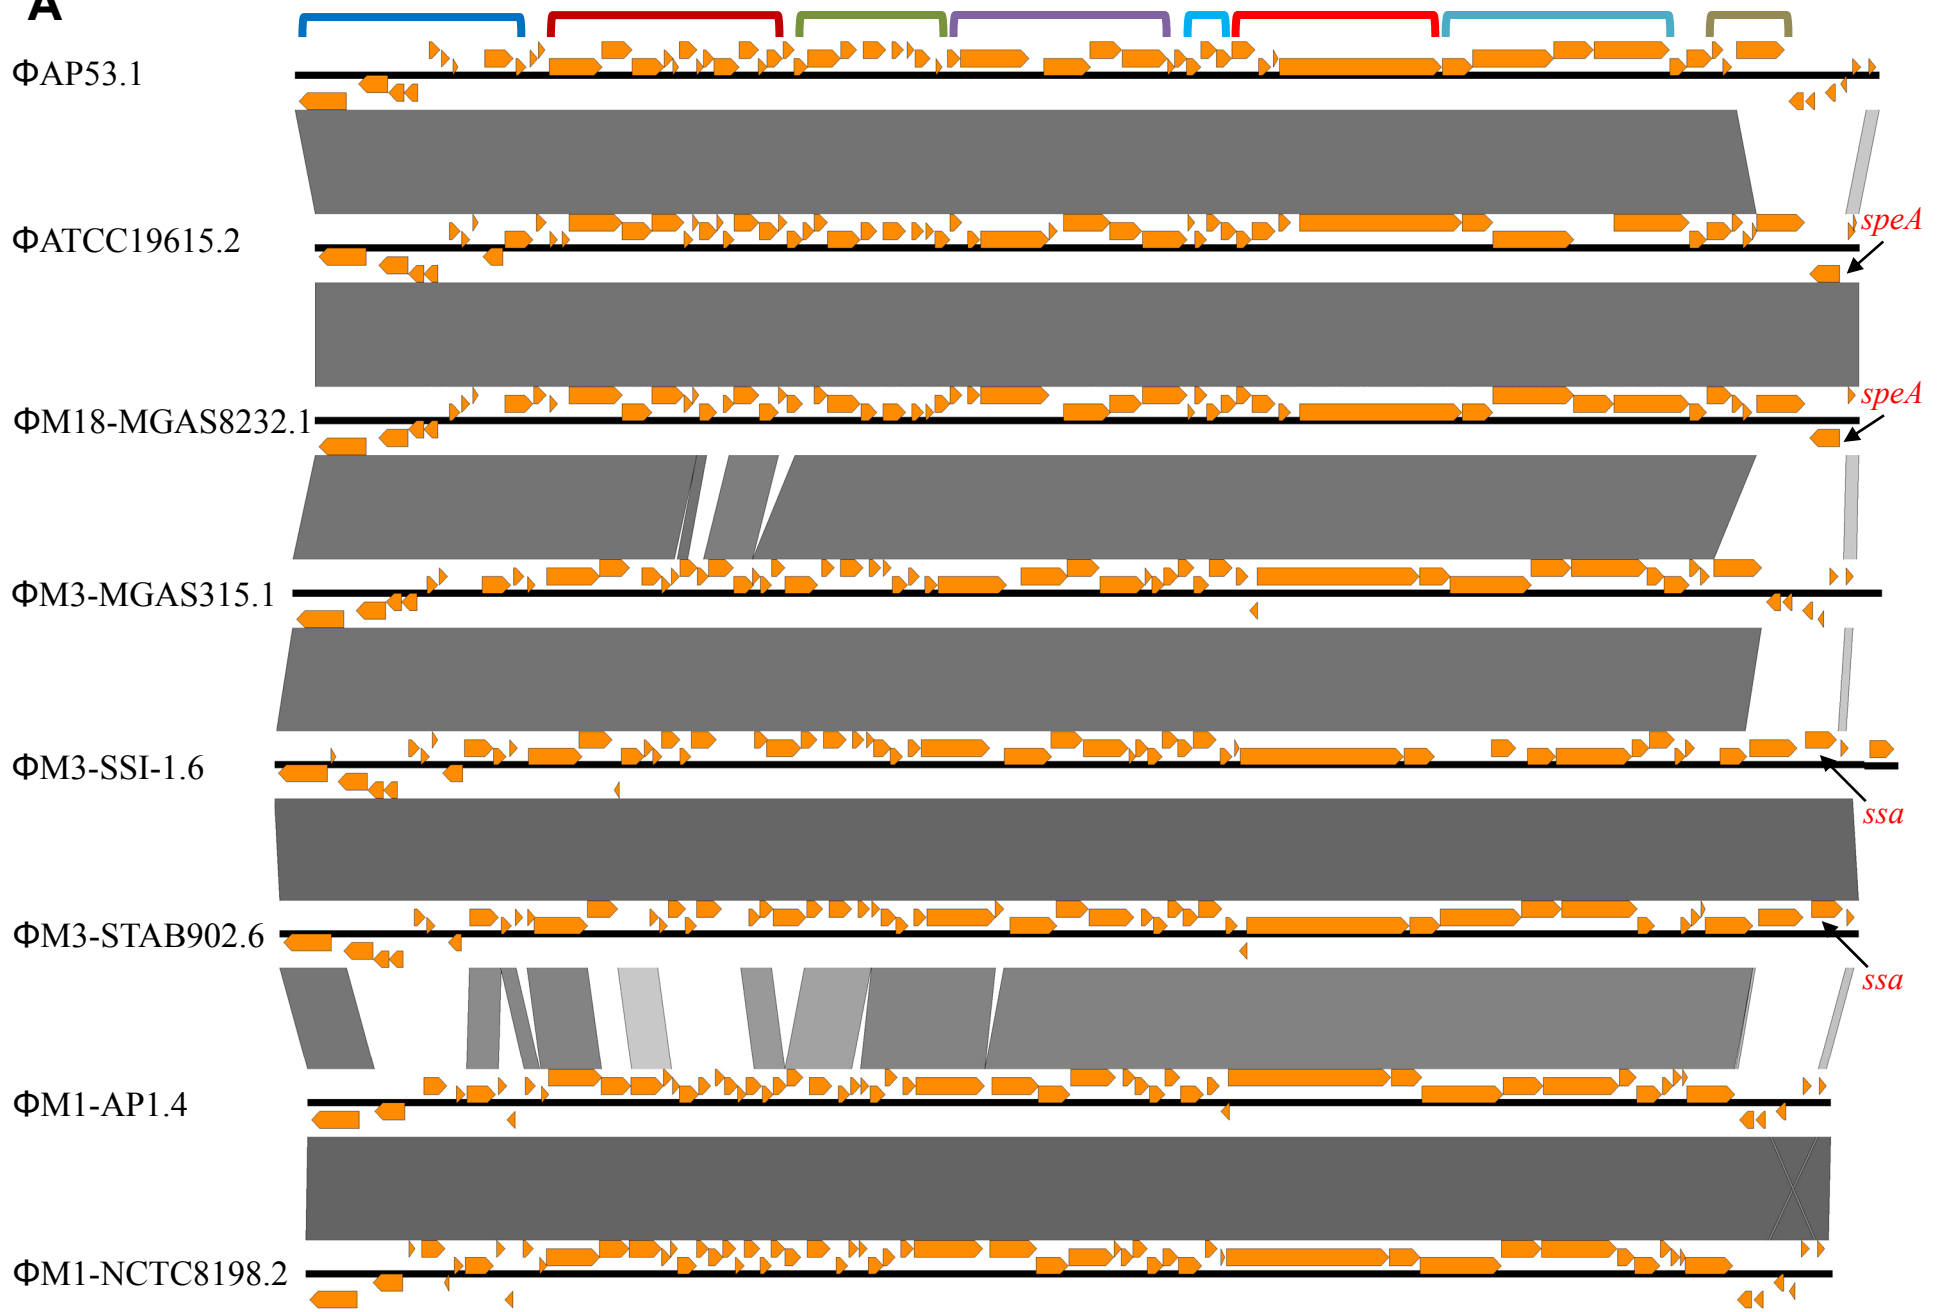 $\Phi$ AP53.1 $\Phi$ ATCC19615.2 $\Phi$ M18-MGAS8232.1 $\Phi$ M3-MGAS315.1 $\Phi$ M3-SSI-1.6 $\Phi$ M3-STAB902.6 $\Phi$ M1-AP1.4 $\Phi$ M1-NCTC8198.2*speA**speA**ssa**ssa*

**B**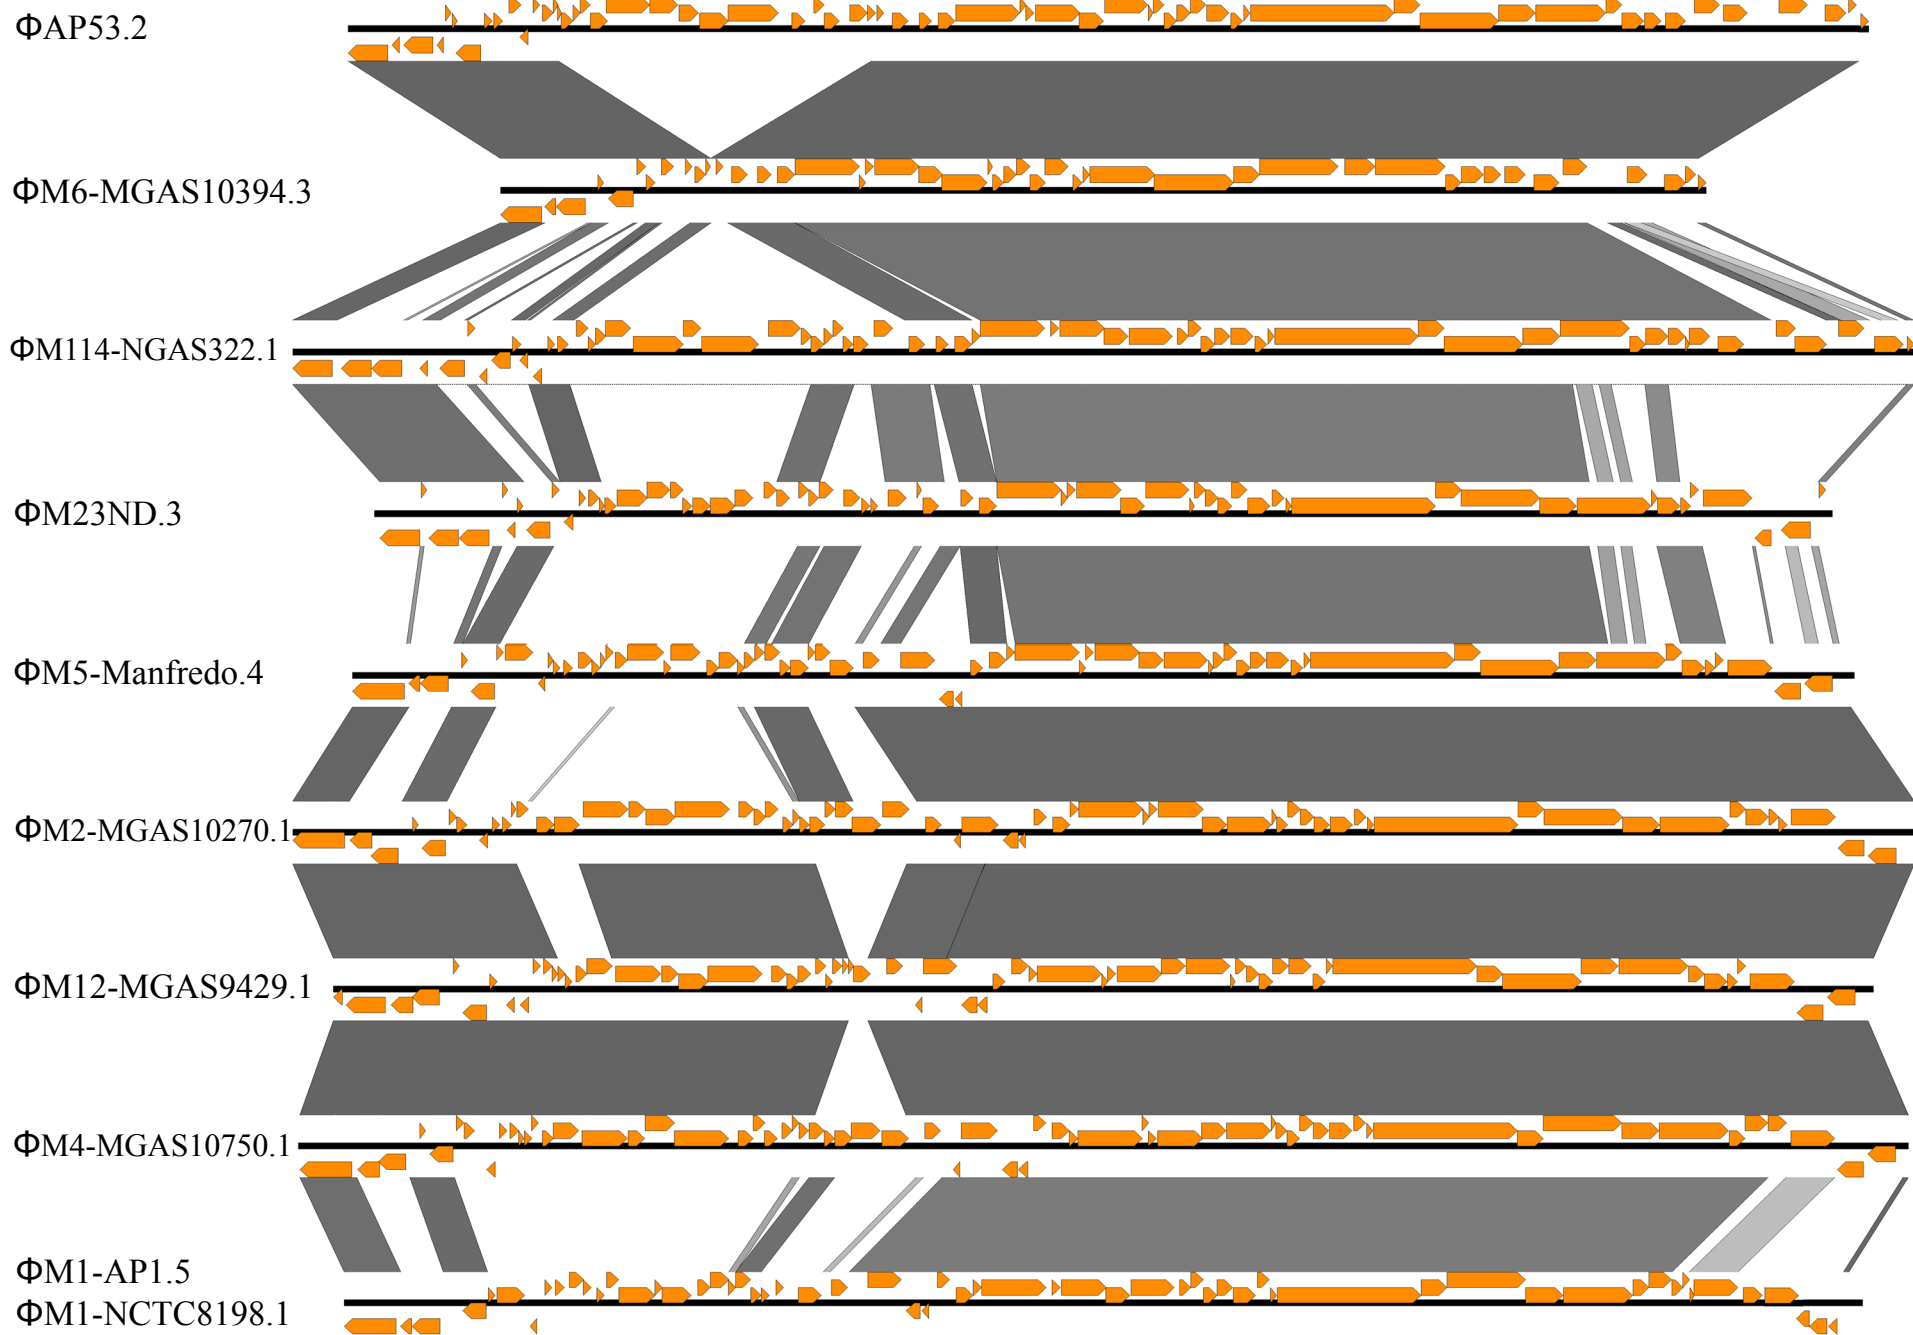

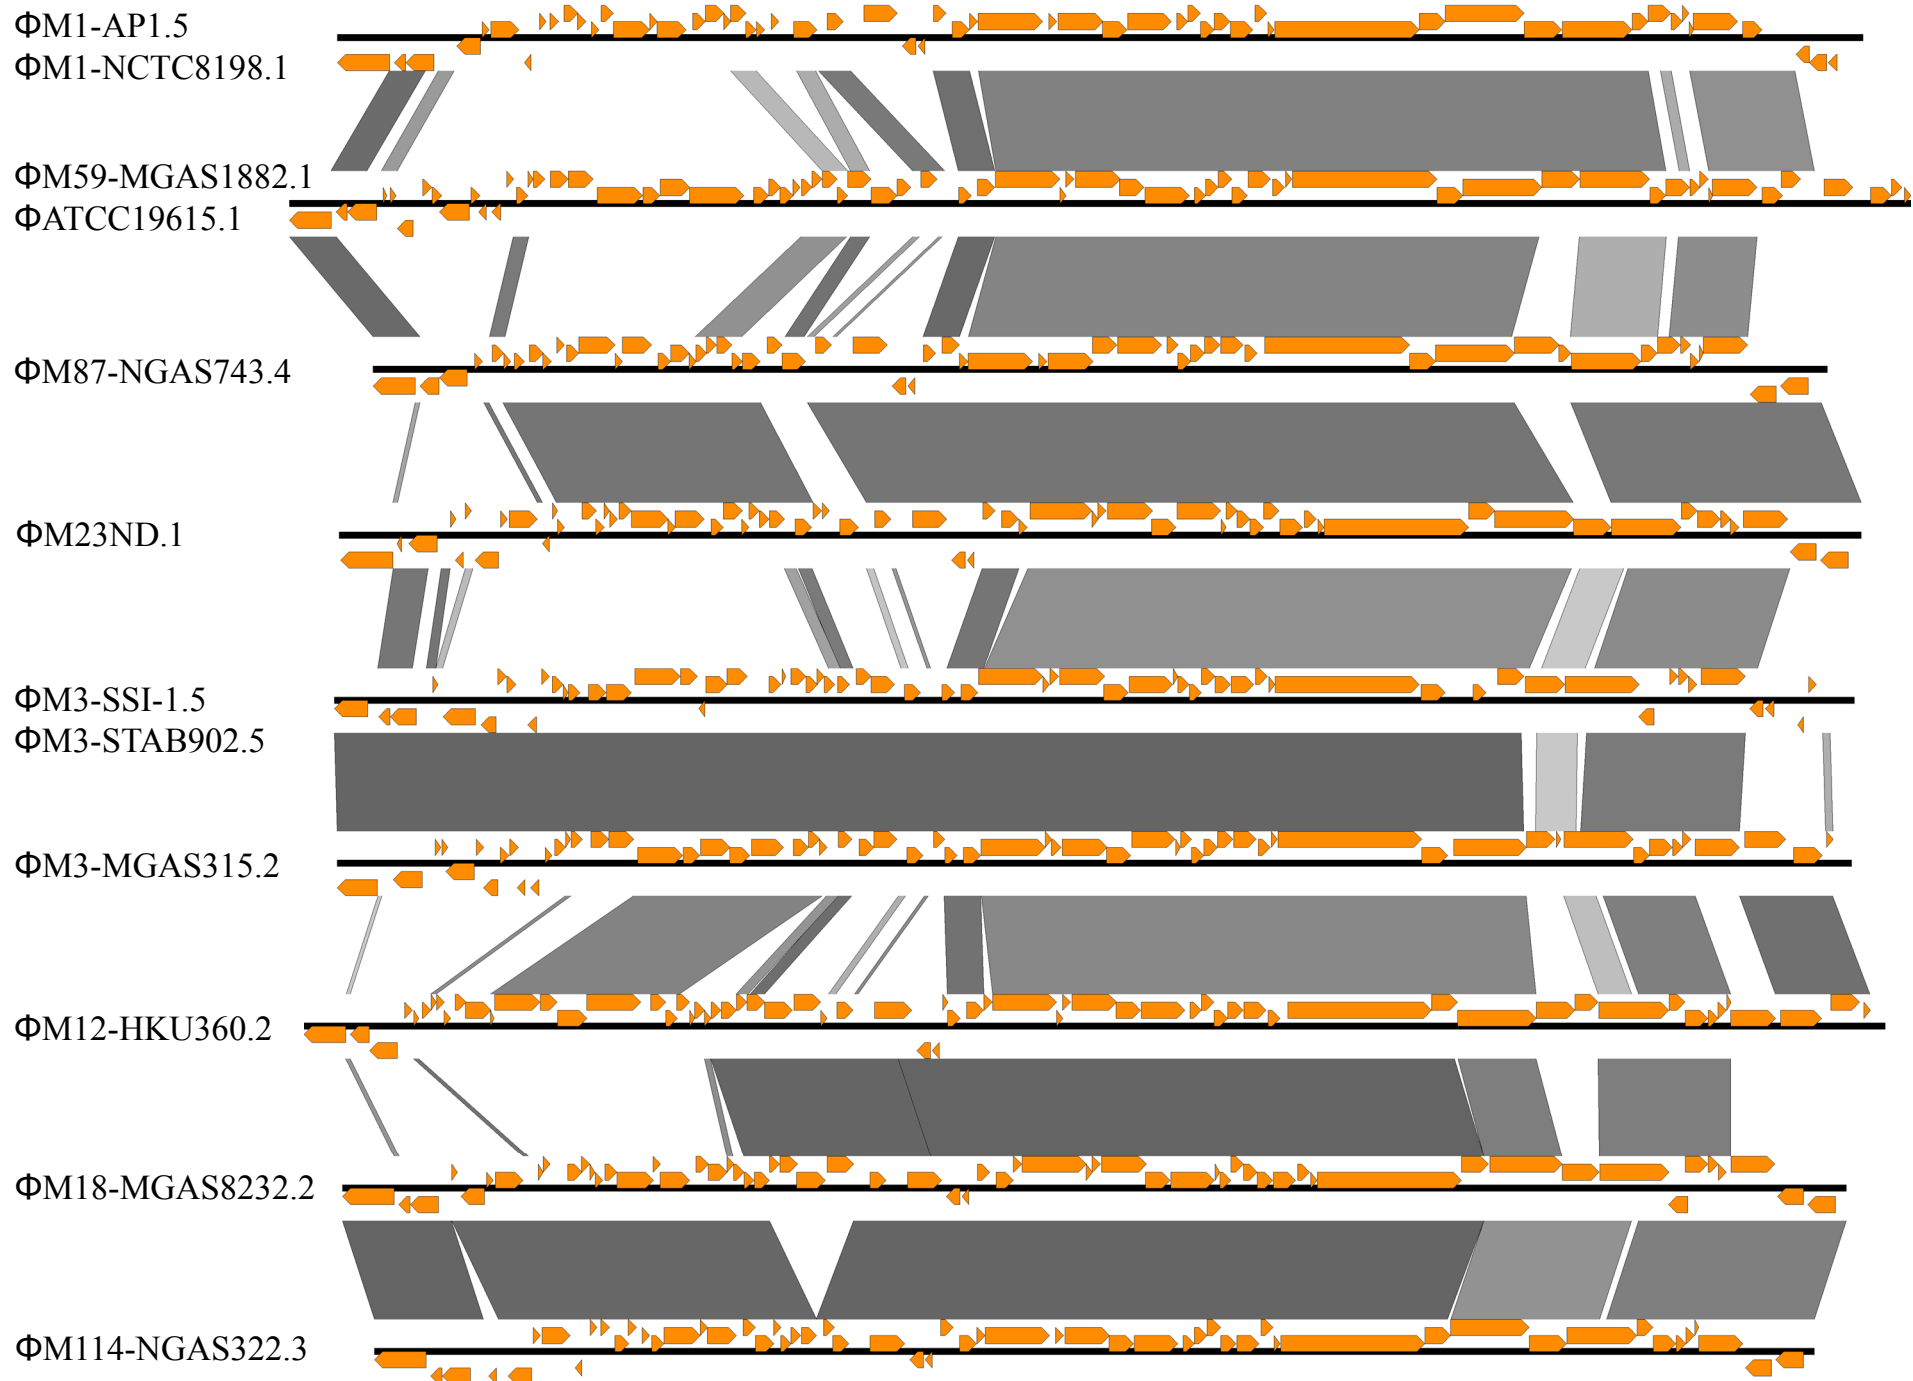

**C**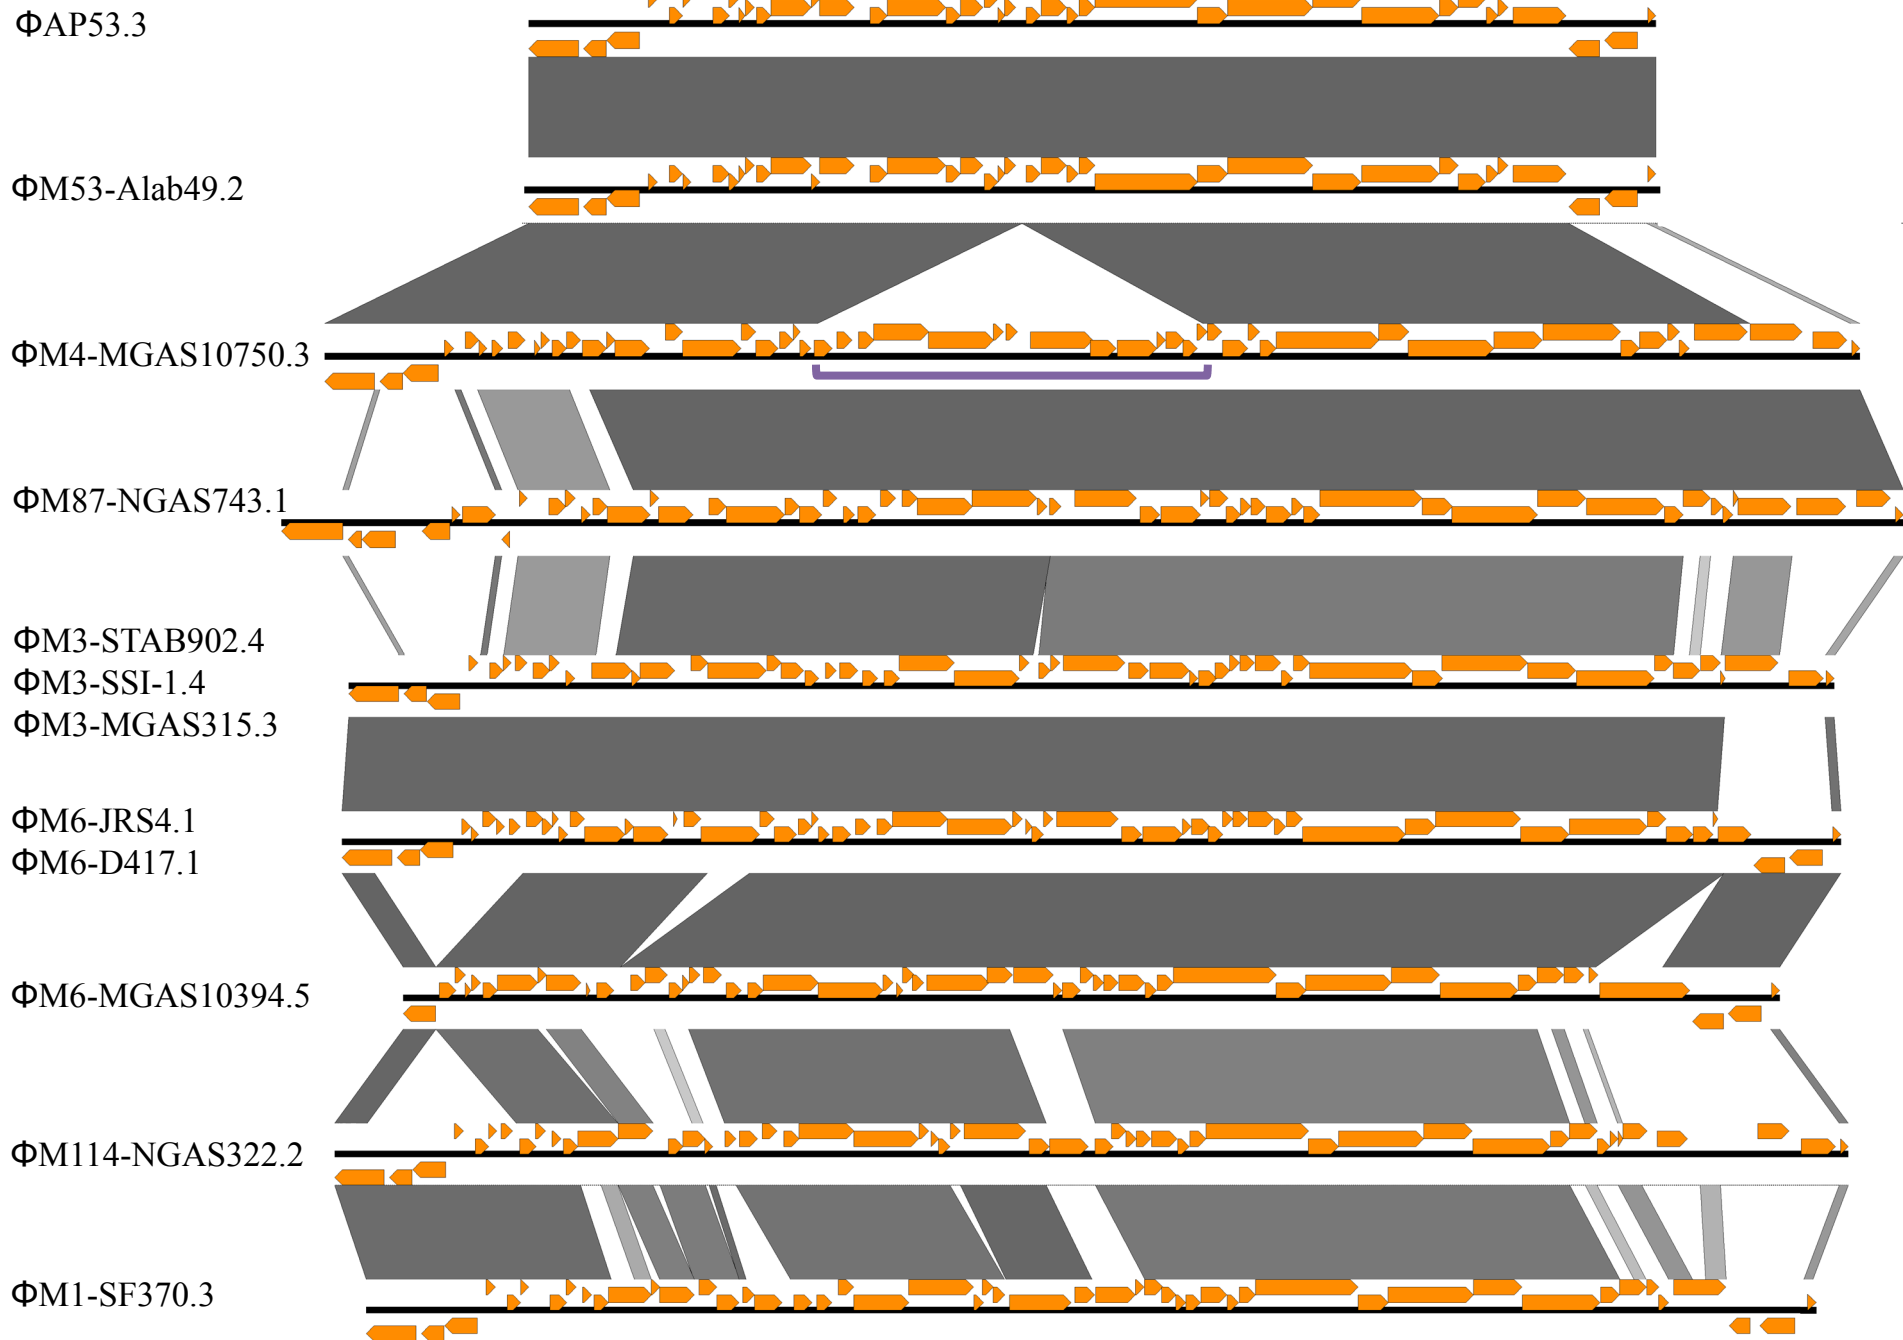

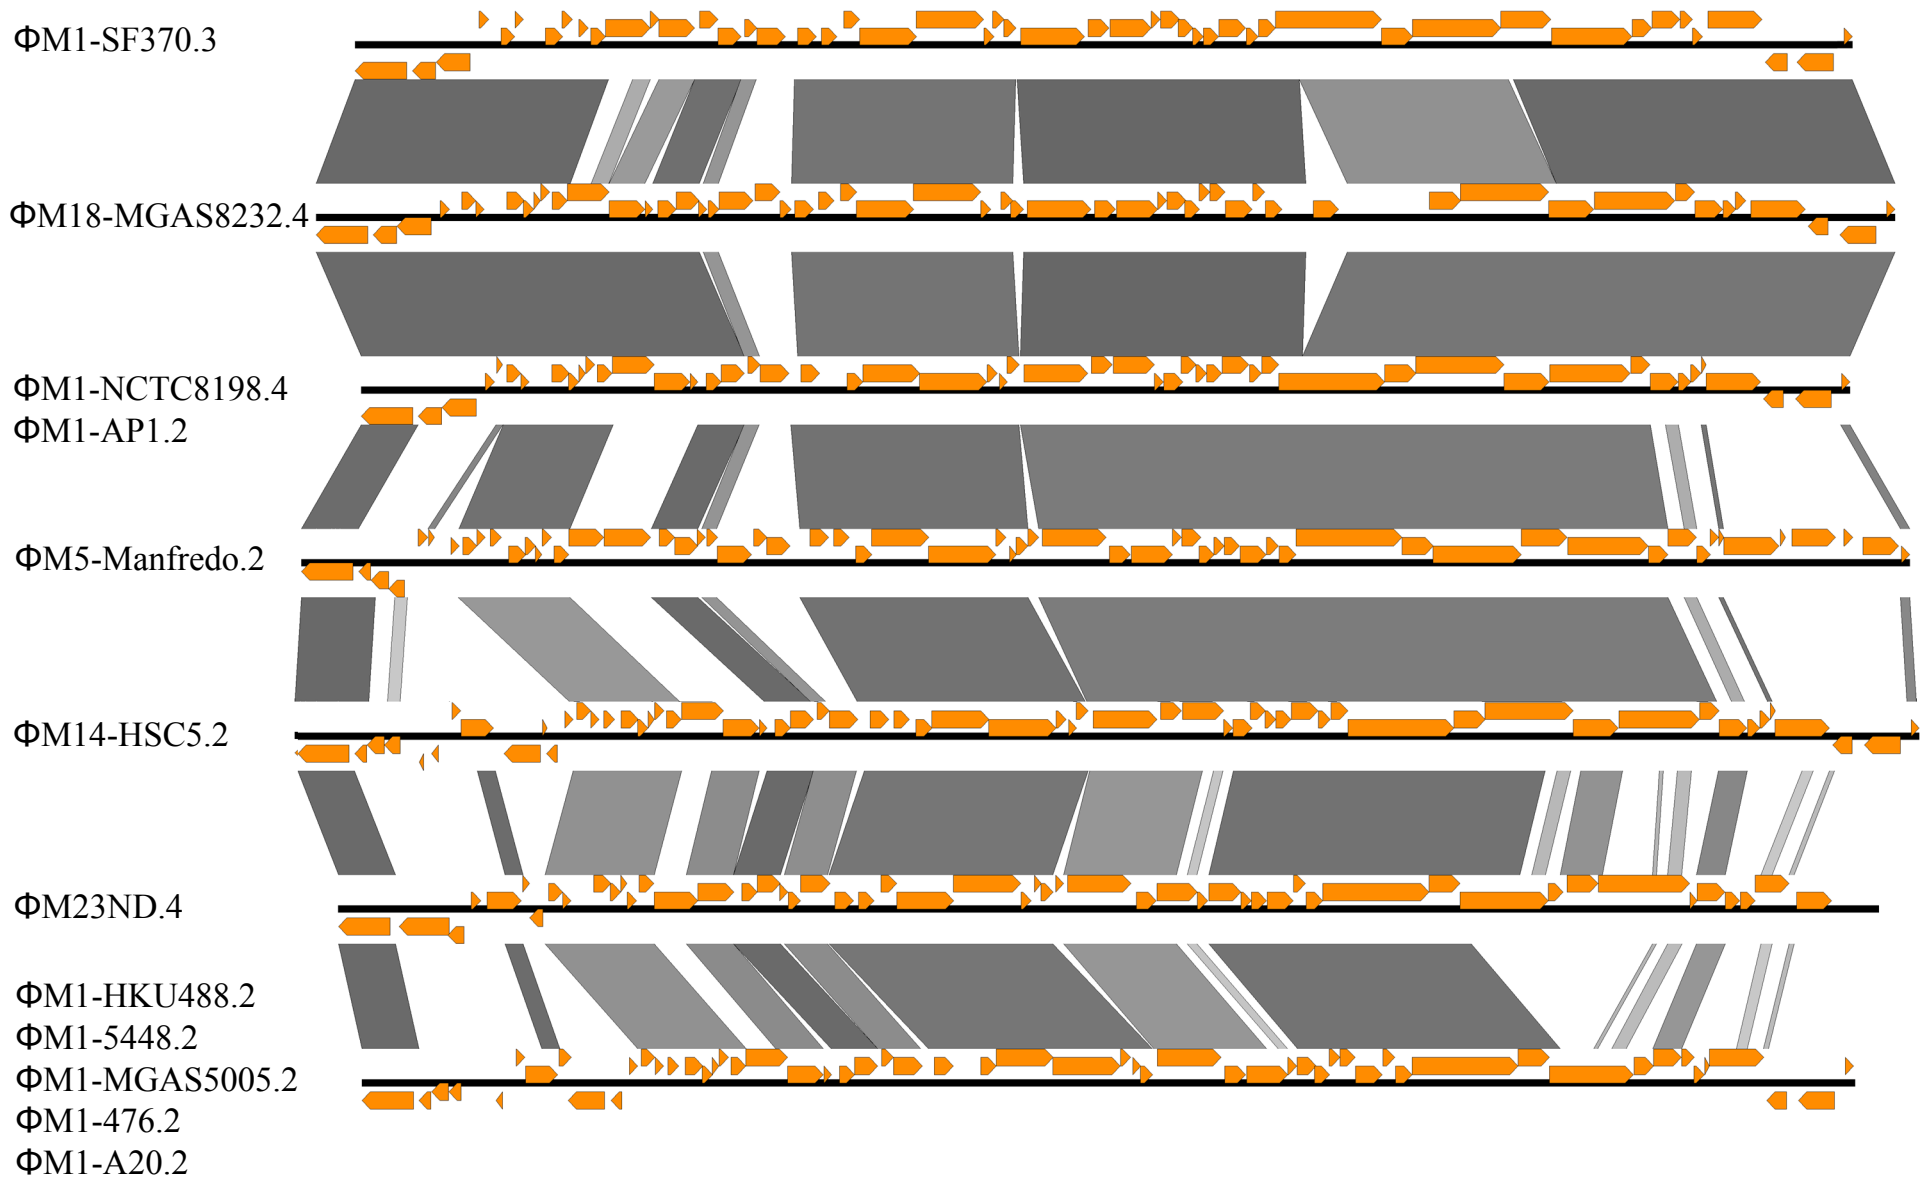

**D**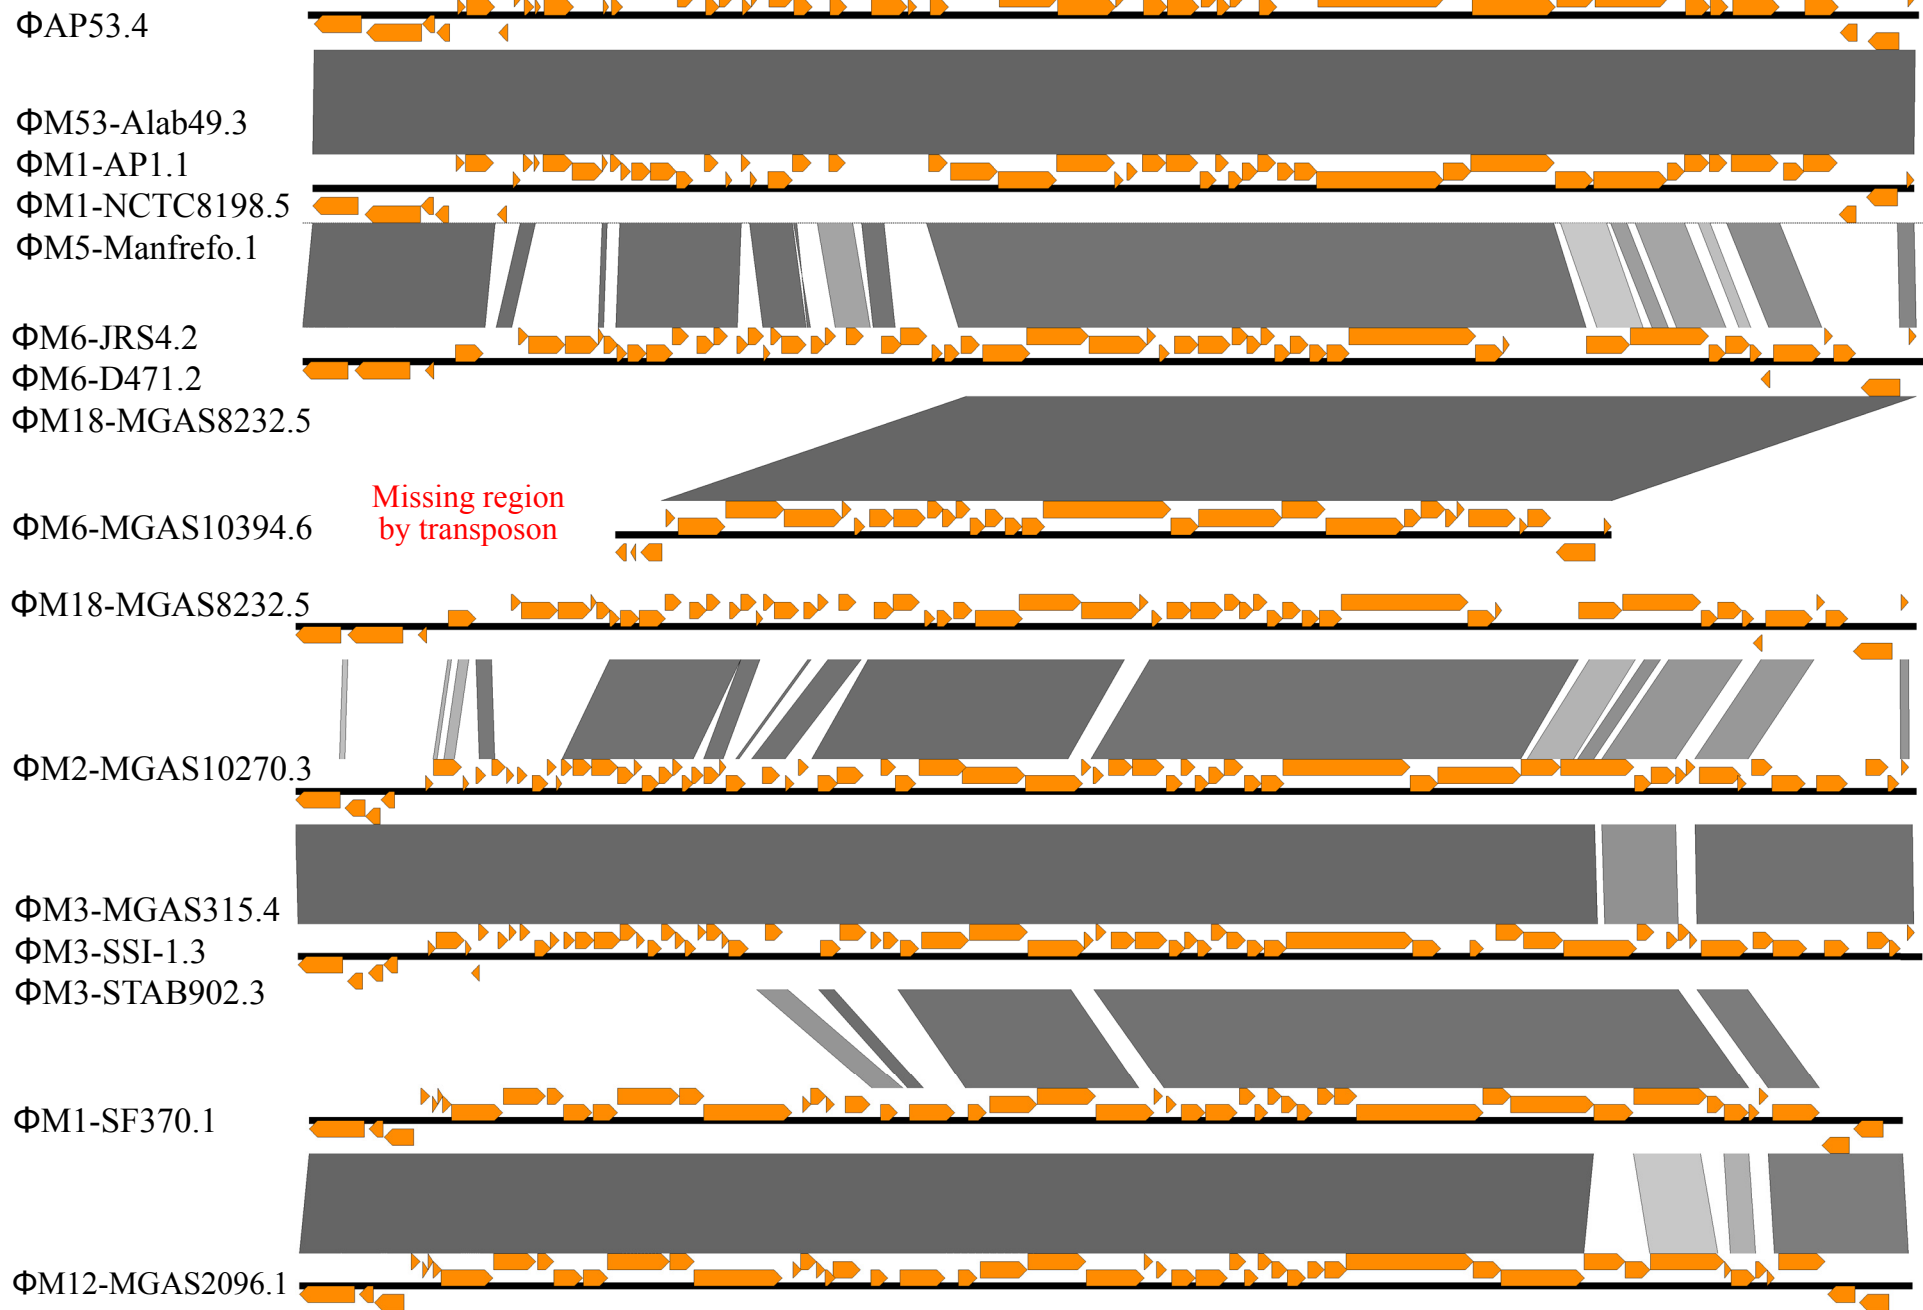



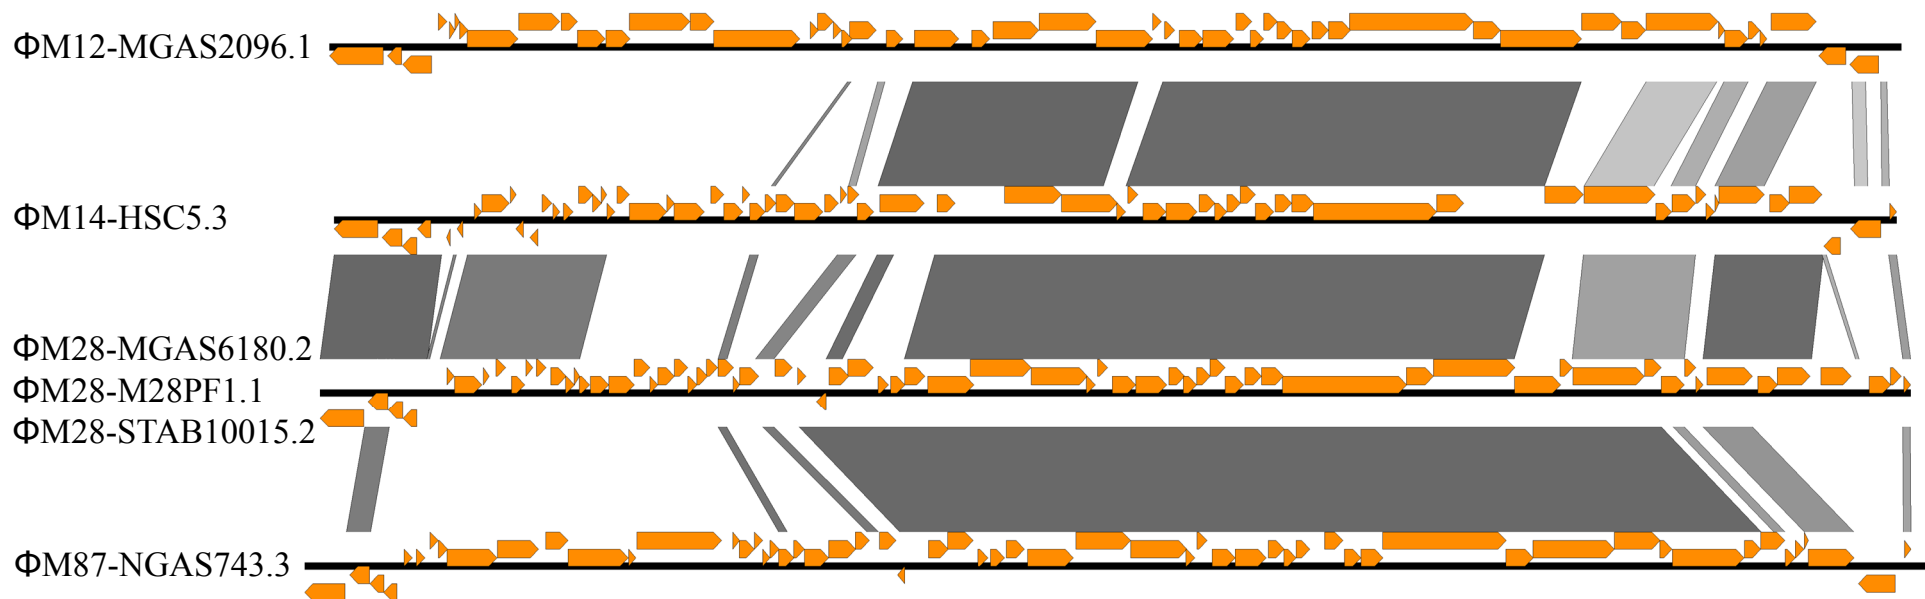

- |                                                            |                                                       |
|------------------------------------------------------------|-------------------------------------------------------|
| <span style="color: blue;">■</span> Lysogeny control       | <span style="color: red;">■</span> Tail morphogenesis |
| <span style="color: darkred;">■</span> DNA replication     | <span style="color: cyan;">■</span> Tail fiber        |
| <span style="color: olive;">■</span> Regulation            | <span style="color: olive;">■</span> Host cell lysis  |
| <span style="color: purple;">■</span> DNA packaging & head | <span style="color: black;">■</span> Virulence        |
| <span style="color: cyan;">■</span> Head-tail joining      |                                                       |

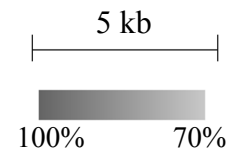

**E**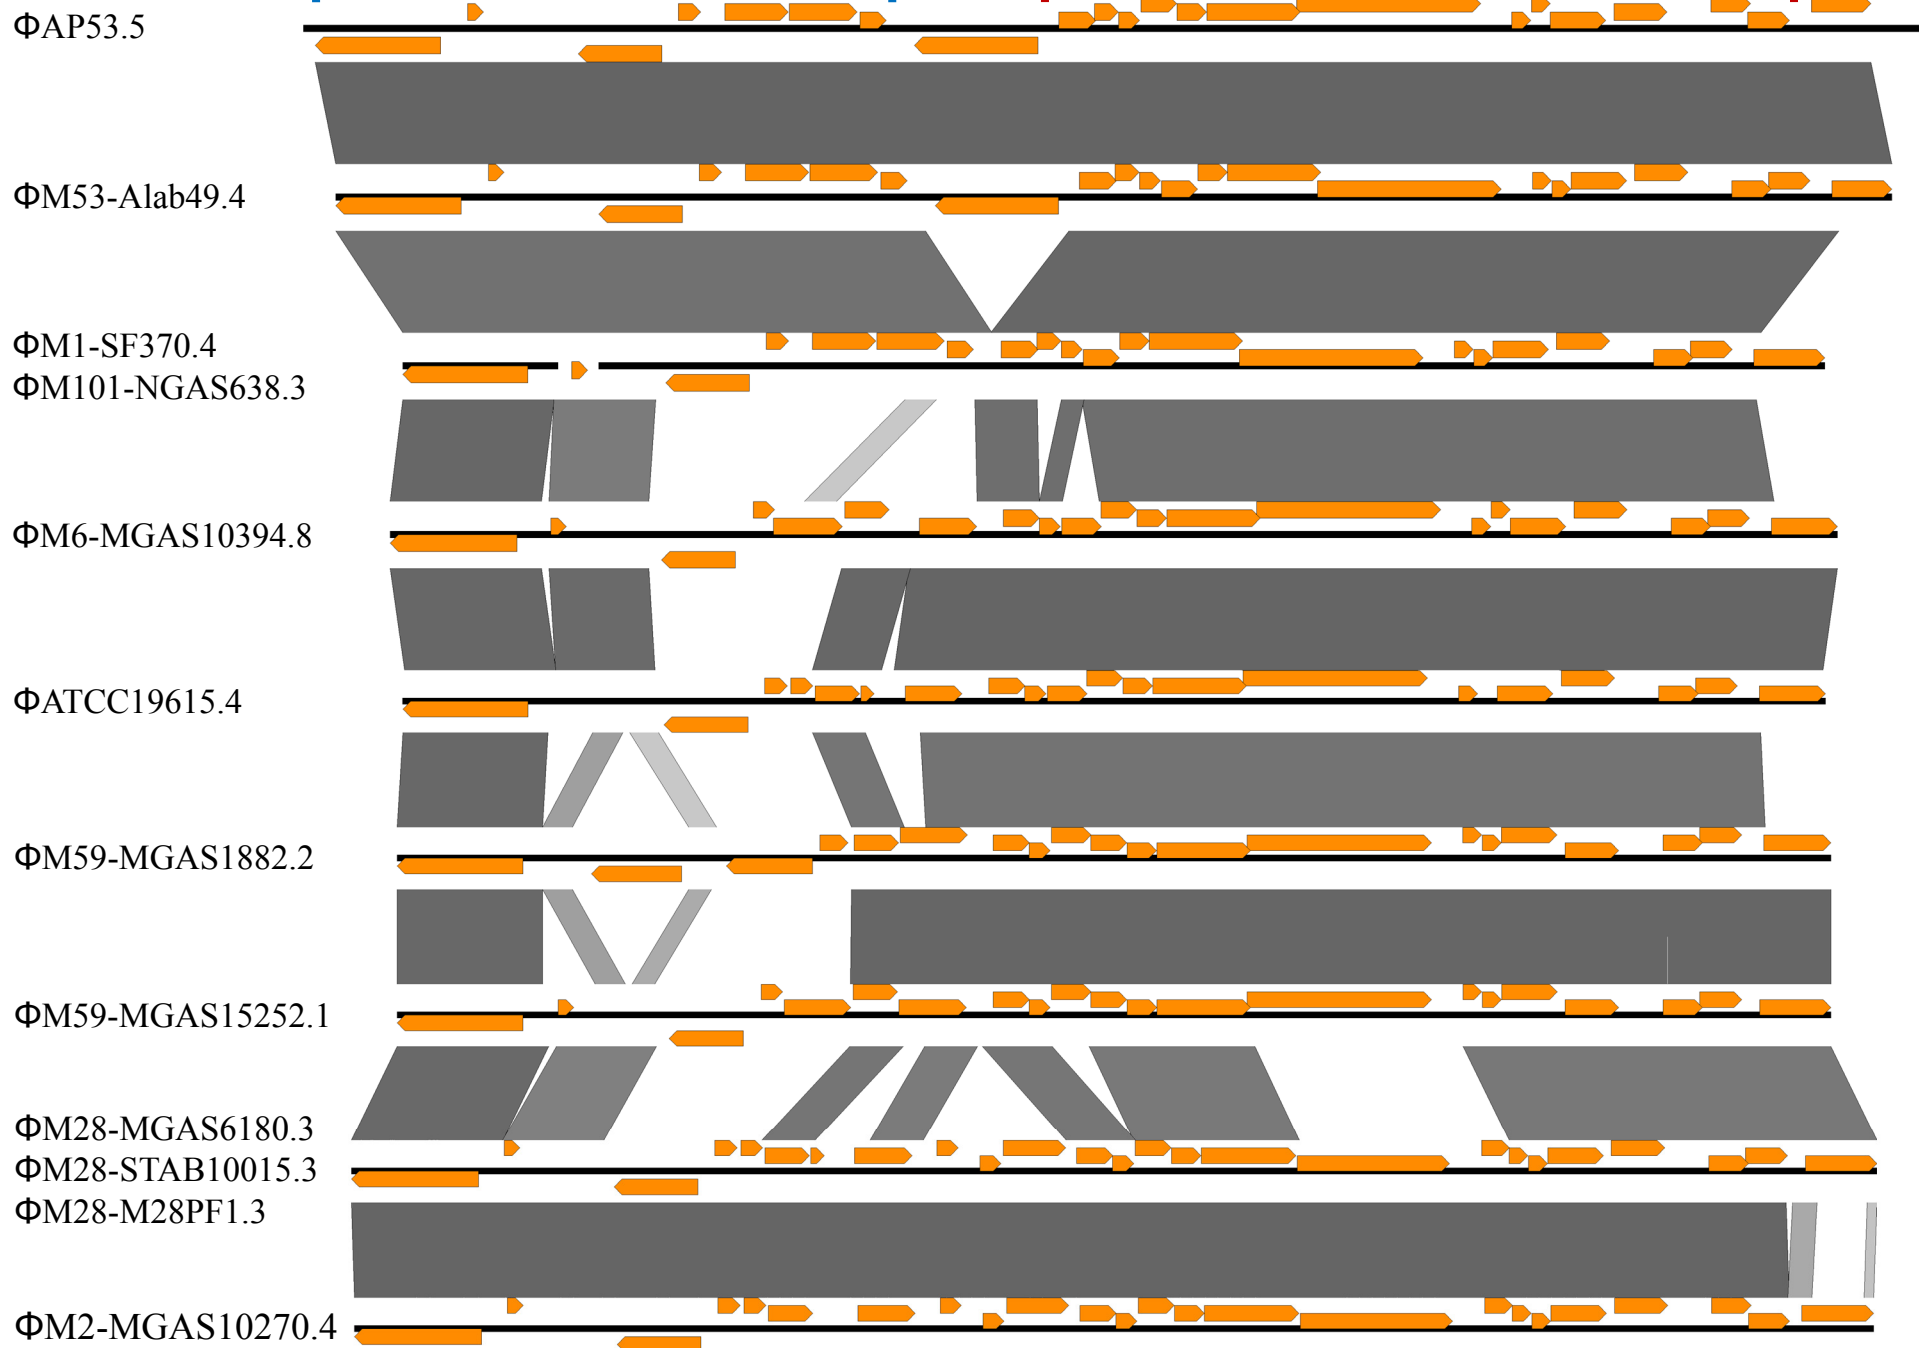

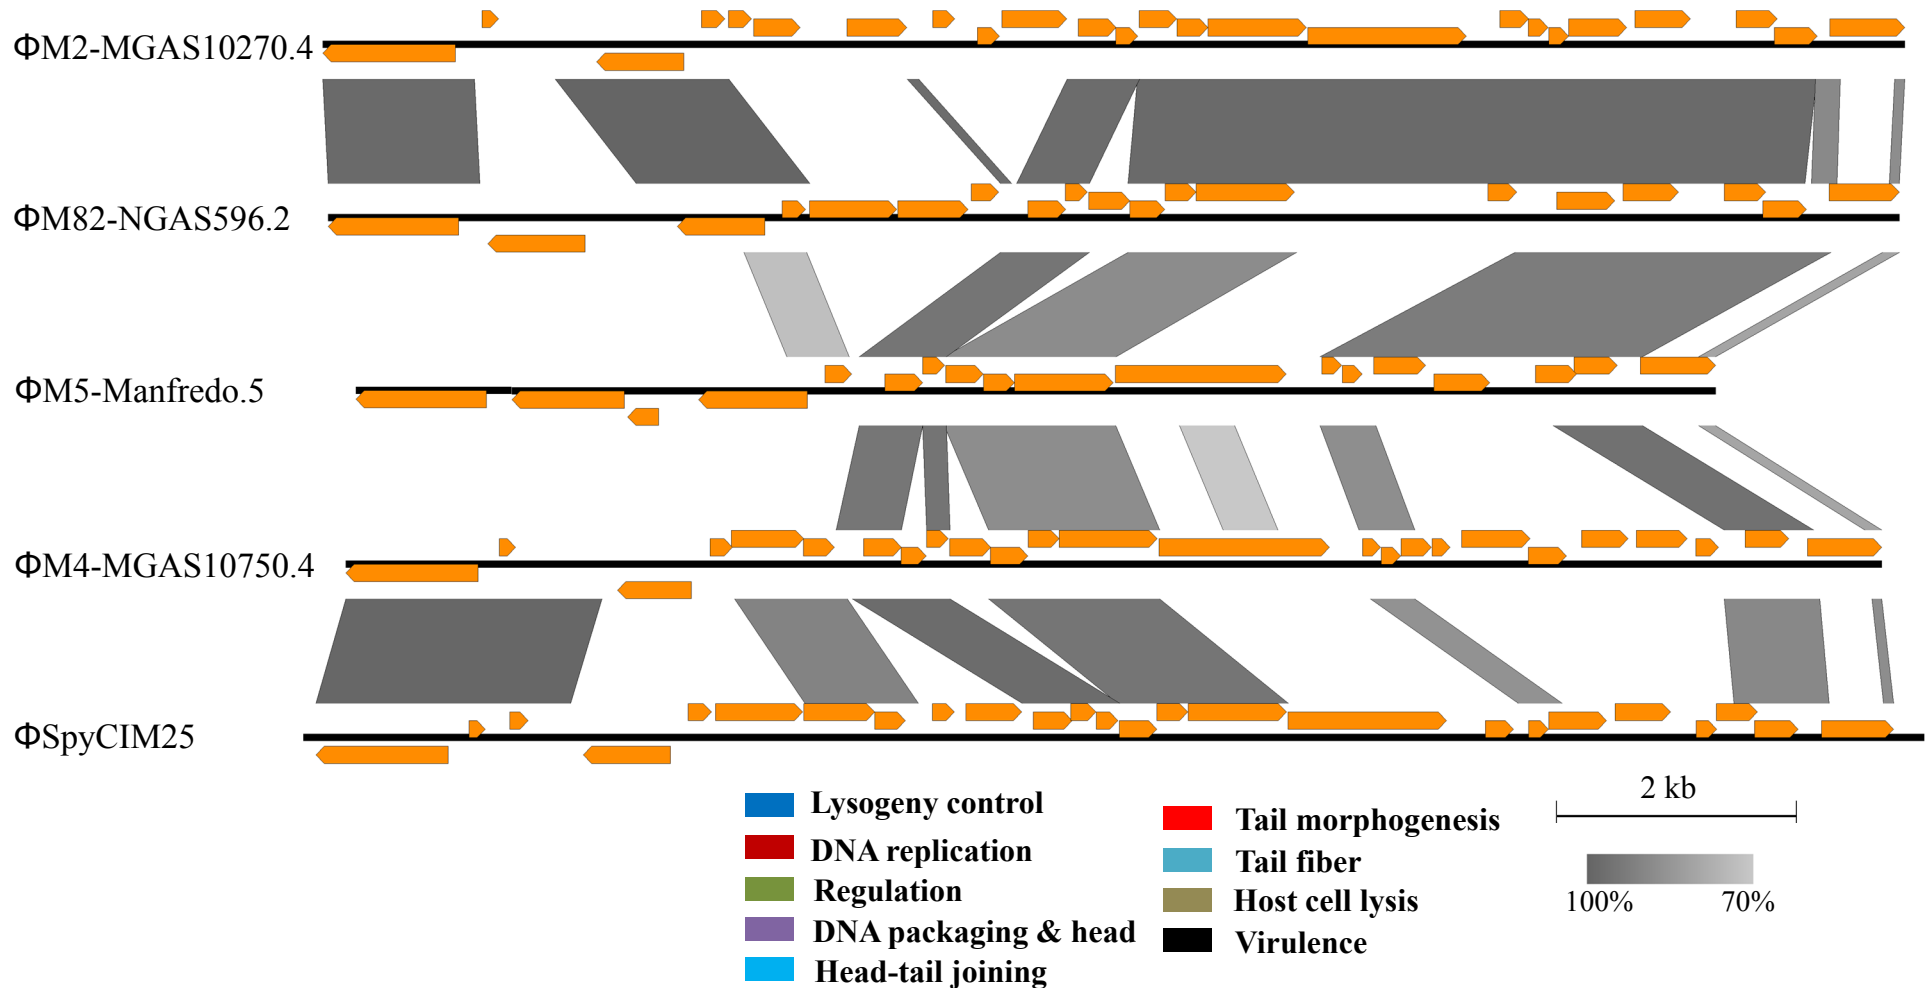

**FIG S3 Multiple sequence alignments of homologous phages of  $\Phi$ AP53.1 (A),  $\Phi$ AP53.2 (B),  $\Phi$ AP53.3 (C),  $\Phi$ AP53.4 (D), and  $\Phi$ AP53.5 (E).** The sequence similarities are shown in gradient greyscale from 70%-100%. The modular functions of the aligned genes are indicated by brackets and color-coding. The phages within the same homologous groups contain conserved regions in the module of head and tail morphogenesis, although divergent in other regions, most significantly in DNA replication, host lysis, and virulence. Specifically, the group of  $\Phi$ AP53.1-like phages are more conserved across the whole span of the phage region, except in the module of lysis and virulence, where the sequences are highly mosaic and the homology terminates abruptly. This indicates that the recombination events occurred in this region, resulting in the deletion of toxin genes in some of the host strains, including AP53.

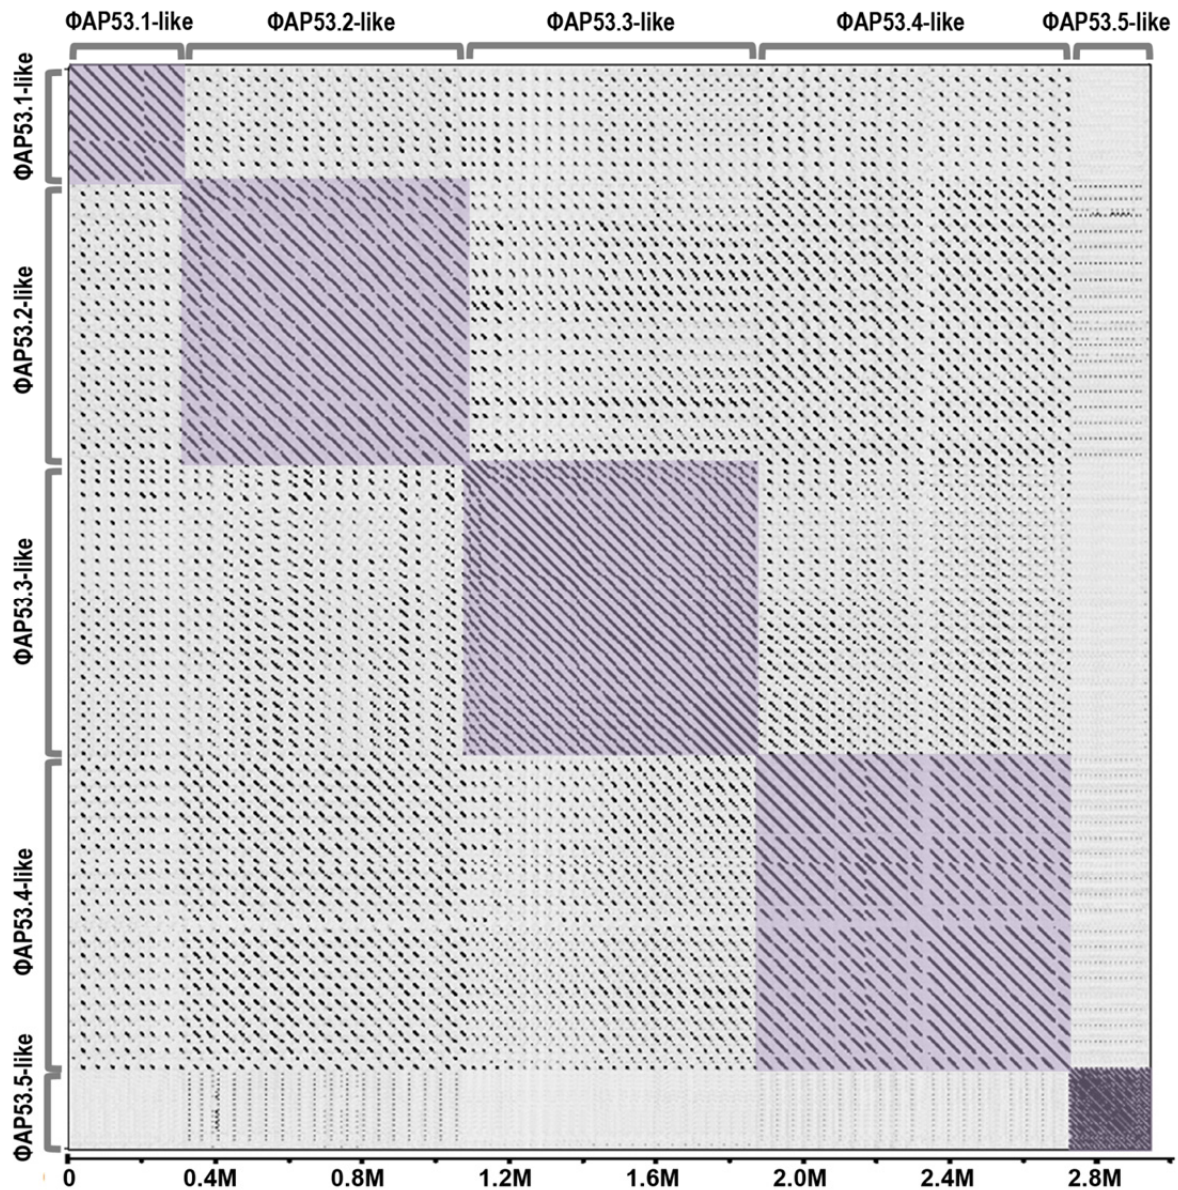

**FIG S4 Dot-plot representation of multiple sequence comparison of phages from AP53 and their homologues.** The diagonal lines indicate high levels of sequence identity and the discontinuous dots represent sporadic similarities. Five phages encoded by AP53 fall into distinct homology clusters (in purple shading), and only sporadic similarities were detected between different clusters in the segments of tail fiber genes (or hyaluronidase) (represented by the dots).

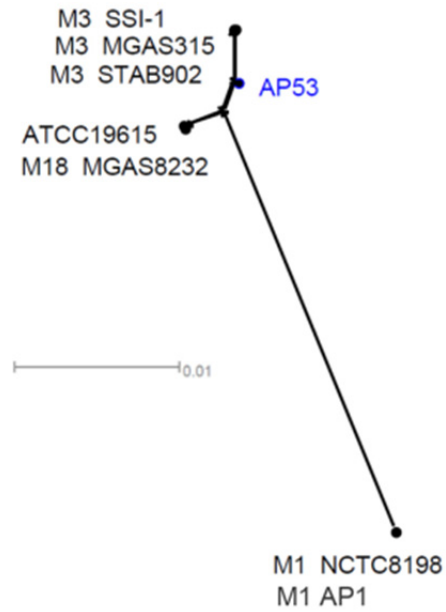

**FIG S5 Phylogenetic network representation of phages from the  $\Phi$ AP53.1-like group.** The phylogeny structures were built based on multiple sequence alignment of conserved regions in the gene module of head and tail morphogenesis. A two-branch structure was formed, similar to that for the groups of  $\Phi$ AP53.5,  $\Phi$ AP53.3 and  $\Phi$ AP53.4-like phages.

**TABLE S1 Primers used for qRT-PCR experiments.**

| <b>Primer</b> | <b>Sequence (5'→3')</b>  | <b>Sequence position<sup>#</sup><br/>(Length)</b> |
|---------------|--------------------------|---------------------------------------------------|
| <i>spd3-F</i> | ACAAGTACTGTTACGGCAGCCAG  | 73-379 (307)                                      |
| <i>spd3-R</i> | GGTAACCAACTAAATGGCCACGG  |                                                   |
| <i>speC-F</i> | CGGTGAGTACATCTATGGAGGAAT | 327-562 (236)                                     |
| <i>speC-R</i> | CAATTTCGATTCTGCCGCTTACA  |                                                   |
| <i>spd1-F</i> | GAATGTATCCCATGCAAACACAC  | 108-345 (238)                                     |
| <i>spd1-R</i> | CCATGAAGATTTTGAGCCATCTC  |                                                   |
| <i>speK-F</i> | GCCAAACAAGGAACGCAATTGAT  | 220-677 (458)                                     |
| <i>speK-R</i> | GTGTGTCTAATGCCACCGTCTT   |                                                   |
| <i>slaA-F</i> | AGCTTCCAAAATGGTGAACCTCCT | 127-473 (347)                                     |
| <i>slaA-R</i> | ACTAGCTGACGGTTACATTCACA  |                                                   |
| <i>plr-F</i>  | GACGGTACTGAAACAGTTATCTC  | 241-655 (234)                                     |
| <i>plr-R</i>  | GATAGCTTTAGCAGCACCAGTTG  |                                                   |

# The numbering is from the position of start codon of the specific gene. Length refers to the amplicon length.

**TABLE S2 The list of SNPs detected by the genomic comparison of two M53 strains, *i.e.*, AP53 and Alab49.**

| <b>GeneID</b>         | <b>AA change<sup>1</sup></b> | <b>Function</b>                             |
|-----------------------|------------------------------|---------------------------------------------|
| SNPs unique to Alab49 |                              |                                             |
| 98                    | Leu122Ser                    | tRNA-binding protein                        |
| 127                   | Leu429Ile                    | V-type ATP synthase subunit B               |
| 209                   | Gln89Arg                     | Putative deoxyribonuclease YcfH             |
| 415                   | Asn33Ser                     | Membrane protein                            |
| 574                   | His60Tyr                     | Phenylalanyl-tRNA synthetase beta chain     |
| 920                   | Lys248Glu                    | Tyrosine recombinase XerC                   |
| 940                   | Arg198Ser                    | Luciferase-like monooxygenase               |
| 973                   | Arg863His                    | ABC transporter permease protein            |
| 1110                  | Ala242Thr                    | 5-Enolpyruvylshikimate-3-phosphate synthase |
| 1163                  | Glu22Lys                     | Cold-shock DEAD-box protein A               |
| 1291                  | Trp643Stp                    | Beta-galactosidase                          |
| 1400                  | Ile64Thr                     | NAD synthetase                              |
| 1429                  | Met523Ile                    | Glycyl-tRNA synthetase beta chain           |
| 1430                  | Phe7Leu                      | Glycyl-tRNA synthetase alpha chain          |
| 1510                  | Ser229Tyr                    | ABC transporter permease protein            |
| 1564                  | Ser143Pro                    | Aquaporin (Major Intrinsic Protein Family)  |
| 1579                  | Ile7Thr                      | SSU ribosomal protein S14p (S29e)           |
| 1716                  | Lys22Glu                     | Glycerol dehydrogenase                      |
| 1764                  | Ser176Arg                    | UPF0246 protein YaaA                        |
| 1834                  | Ala48Thr                     | Phosphoesterase, DHH family protein         |
| SNPs unique to AP53   |                              |                                             |
| 130                   | Lys142Asn                    | Hypothetical protein                        |
| 151                   | His401Asn                    | DNA polymerase I                            |
| 261                   | Gly67Glu                     | Trk system potassium uptake protein TrkA    |
| 511                   | Phe43Leu                     | Unsaturated glucuronyl hydrolase            |
| 686                   | Tyr171Asp                    | Uracil phosphoribosyltransferase            |
| 925                   | Val210Ala                    | Hypothetical protein                        |
| 926                   | Cys291Arg                    | GMP synthase amidotransferase subunit       |
| 979                   | Ile125Thr                    | General stress protein, Gls24 family        |
| 1226                  | Val178Ala                    | Exodeoxyribonuclease VII large subunit      |
| 1492                  | Val172Met                    | Heat shock protein GrpE                     |
| 1679 <sup>2</sup>     | Met221Ile                    | Chromosome segregation helicase             |

1. The column “AA change” indicates the amino acid change caused by the mutation. The numbers represent the codon position in the translated proteins.

2. The SNP in this gene is not unique to Alab49 or AP53.

**TABLE S3. The homologous phages of each of the five phages encoded by AP53 and the corresponding integration sequences**

| <b>GAS strain</b>                                   | <b>Phage Order number</b> | <b>Integration sequences</b>                                                                                     |
|-----------------------------------------------------|---------------------------|------------------------------------------------------------------------------------------------------------------|
| <b>Homologous phages of <math>\Phi</math>AP53.1</b> |                           |                                                                                                                  |
| AP53                                                | 1                         | Non-identifiable <sup>1</sup>                                                                                    |
| ATCC19615                                           | 2                         | Non-identifiable                                                                                                 |
| M18 MGAS8232                                        | 1                         | Non-identifiable                                                                                                 |
| M3 MGAS315                                          | 1                         | Non-identifiable                                                                                                 |
| M3 SSI-1                                            | 6                         | Non-identifiable                                                                                                 |
| M3 STAB902                                          | 6                         | Non-identifiable                                                                                                 |
| M1 AP1                                              | 4                         | Non-identifiable                                                                                                 |
| M1 NCTC8198                                         | 2                         | Non-identifiable                                                                                                 |
| <b>Homologous phages of <math>\Phi</math>AP53.2</b> |                           |                                                                                                                  |
| AP53                                                | 2                         | ACTCCCACCAGCTCCATCAATGCTTACCGTAAGTAATCATAACTTACTA<br>AAACCTTGTTACATCAAGGTTTTTCTTTTGTCTTGTTTCATGAGTT              |
| M6 MGAS10394                                        | 3                         | ACTCCCACCAGCTCCATCAATGCTTACCGTAAGTAATCATAACTTACTA<br>AAACCTTGTTACATCAAGGTTTTTCTTTTGTCTTGTTTCATGAGTT              |
| M114 NGAS322                                        | 1                         | ACTCCCACCAGCTCCATCAATGCTTACCGTAAGTAATCATAACTTACTA<br>AAACCTTGTTACATCAAGGTTTTTCTTTTGTCTTGTTTCATGAGTT              |
| M23_M23ND                                           | 3                         | ACTCCCACCAGCTCCATCAATGCTTACCGTAAGTAATCATAACTTACTA<br>AAACCTTGTTACATCAAGGTTTTTCTTTTGTCTTGTTTCATGAGTTCC            |
| M5 Manfredo                                         | 4                         | CATGTACAACACTATACTCGT                                                                                            |
| M2 MGAS10270                                        | 1                         | CATGTACAACACTATACTCGT                                                                                            |
| M12 MGAS9429                                        | 1                         | CATGTACAACACTATACTCGT                                                                                            |
| M4 MGAS10750                                        | 1                         | CATGTACAACACTATACTCGT                                                                                            |
| M114 NGAS322                                        | 3                         | CATGTACAACACTATACTCGT                                                                                            |
| M1 AP1                                              | 5                         | CATGTACAACACTATACT[CGT/---] <sup>2</sup>                                                                         |
| M1 NCTC8198                                         | 1                         | CATGTACAACACTATACT[---/CGT] <sup>2</sup>                                                                         |
| ATCC19615                                           | 1                         | AATTATTTAACAGCGTCTTT                                                                                             |
| M59 MGAS1882                                        | 1                         | AATTATTTAACAGCGTCTTT                                                                                             |
| M87 NGAS743                                         | 4                         | AATTATTTAACAGCGTCTTT <sup>3</sup>                                                                                |
| M23 M23ND                                           | 1                         | CATGTACAACACTATACTC                                                                                              |
| M3 SSI-1                                            | 5                         | ACTCCCACCGGCTCCATCAATGCTTACCGTAAGTAATCATAACTTACTA<br>AAACCTTGTTACATCAAGGTTTTTCTTTTGTCTTGTTTCATGAGTT <sup>3</sup> |
| M3 STAB902                                          | 5                         | ACTCCCACCGGCTCCATCAATGCTTACCGTAAGTAATCATAACTTACTA<br>AAACCTTGTTACATCAAGGTTTTTCTTTTGTCTTGTTTCATGAGTT <sup>3</sup> |
| M3 MGAS315                                          | 2                         | ACTCCCACCAGCTCCATCAATGCTTACCGTAAGTAATCATAACTTACTA<br>AAACCTTGTTACATCAAGGTTTTTCTTTTGTCTTGTTTCATGAGTT              |
| M12 HKU360                                          | 2                         | AATTATTTAACAGCGTCTTT                                                                                             |
| M18 MGAS8232                                        | 2                         | CATGTACAACACTATACTCGT                                                                                            |



---

### Homologous phages of $\Phi$ AP53.3

|              |   |                      |
|--------------|---|----------------------|
| AP53         | 3 | AATTATTTAACAGCGTCTTT |
| M53 Alab49   | 2 | AATTATTTAACAGCGTCTTT |
| M4 MGAS10750 | 3 | AATTATTTAACAGCGTCTTT |
| M3 STAB902   | 4 | AATTATTTAACAGCGTCTTT |
| M3 SSI-1     | 4 | AATTATTTAACAGCGTCTTT |
| M3 MGAS315   | 3 | AATTATTTAACAGCGTCTTT |
| M6 JRS4      | 1 | AATTATTTAACAGCGTCTTT |
| M6 D471      | 1 | AATTATTTAACAGCGTCTTT |
| M114 NGAS322 | 2 | AATTATTTAACAGCGTCTTT |
| M1 GAS-SF370 | 3 | AATTATTTAACAGCGTCTTT |
| M18 MGAS8232 | 4 | AATTATTTAACAGCGTCTTT |
| M1 NCTC8198  | 4 | AATTATTTAACAGCGTCTTT |
| M1 AP1       | 2 | AATTATTTAACAGCGTCTTT |
| M5 Manfredo  | 2 | AATTATTTAACAGCGTCTTT |
| M14 HSC5     | 2 | AATTATTTAACAGCGTCTTT |
| M23 M23ND    | 4 | AATTATTTAACAGCGTCTTT |
| M1 HKU488    | 2 | AATTATTTAACAGCGTCTTT |
| M1 5448      | 2 | AATTATTTAACAGCGTCTTT |
| M1 MGAS5005  | 2 | AATTATTTAACAGCGTCTTT |
| M1 476       | 2 | AATTATTTAACAGCGTCTTT |
| M1 A20       | 2 | AATTATTTAACAGCGTCTTT |

### Homologous phages of $\Phi$ AP53.4

|               |   |                                    |
|---------------|---|------------------------------------|
| AP53          | 4 | TATAATGAACATAT                     |
| M53 Alab49    | 3 | TATAATGAACATAT                     |
| M1 NCTC8198   | 5 | TATAATGAACATAT                     |
| M1 AP1        | 1 | TATAATGAACATAT                     |
| M5 Manfredo   | 1 | TATAATGAACATAT                     |
| M18 MGAS8232  | 5 | TATAATGAACATAT                     |
| M6 D471       | 2 | TATAATGAACATAT                     |
| M6 JRS4       | 2 | TATAATGAACATAT                     |
| M6 MGAS10394  | 6 | TATAATGAACATAT                     |
| M2 MGAS10270  | 3 | TCTT[C/A]TATTATATCAGA <sup>3</sup> |
| M3 SSI-1      | 3 | TCTT[A/T]TATTATATCAGA <sup>3</sup> |
| M3 MGAS315    | 4 | TCTT[T/A]TATTATATCAGA <sup>3</sup> |
| M3 STAB902    | 3 | TCTT[T/A]TATTATATCAGA <sup>3</sup> |
| M1 GAS-SF370  | 1 | CATGTACAACATACT                    |
| M12 MGAS2096  | 1 | CATGTACAACATACT                    |
| M14 HSC5      | 3 | CTTATATTATAACAAAAA                 |
| M28 M28PF1    | 1 | TCTT[A/C]TATTATATCAGA <sup>3</sup> |
| M28 MGAS6180  | 2 | TCTT[C/A]TATTATATCAGA <sup>3</sup> |
| M28 STAB10015 | 2 | TCTT[C/A]TATTATATCAGA              |
| M87 NGAS743   | 3 | CAATAATGACCCCTGCCGGAATC            |

---

---

### Homologous phages of $\Phi$ AP53.5

---

|                |   |                        |
|----------------|---|------------------------|
| AP53           | 5 | CAATAATGTTTGGTCATAATTT |
| M53 Alab49     | 4 | CAATAATGTTTGGTCATAATTT |
| M1 GAS-SF370   | 4 | CAATAATGTTTGGTCATAATTT |
| M101 NGAS638   | 3 | CAATAATGTTTGGTCATAATTT |
| M6 MGAS10394   | 8 | CAATAATGTTTGGTCATAATTT |
| ATCC19615      | 4 | CAATAATGTTTGGTCATAATTT |
| M59 MGAS1882   | 2 | CAATAATGTTTGGTCATAATTT |
| M59 MGAS15252  | 1 | CAATAATGTTTGGTCATAATTT |
| M28 STAB10015  | 3 | CAATAATGTTTGGTCATAATTT |
| M28 M28PF1     | 3 | CAATAATGTTTGGTCATAATTT |
| M28 MGAS6180   | 3 | CAATAATGTTTGGTCATAATTT |
| M2 MGAS10270   | 4 | CAATAATGTTTGGTCATAATTT |
| M82 NGAS596    | 2 | CAATAATGTTTGGTCATAATTT |
| M5 Manfredo    | 5 | CAATAATGTTTGGTCATAATTT |
| M4 MGAS10750   | 4 | CAATAATGTTTGGTCATAATTT |
| T25-3_SypCIM25 | 1 | CAATAATGTTTGGTCATAATTT |

---

1. “Non-identifiable”: the integration sequences for the group of  $\Phi$ AP53.1-like phages cannot be precisely identified due to the short and divergent *att*-site sequences on both sides of the phages.
2. There are mismatches between the two *att*-site sequences on the two sides of the phages, shown in brackets.
3. The indicated integration sequences were only identified on either side of the phages due to a large inversion, which interrupted the paired relationship of the integration sequences on both sides of the phages.
